# Supplementary material for: Three cachexia phenotypes and the impact of fat‐only loss on survival in FOLFIRINOX therapy for pancreatic cancer
Source: PubMed Central journal article supplement — J Cachexia Sarcopenia Muscle. 2018 Jul 5;9(4):673–84. doi: 10.1002/jcsm.12307 (PMC6104116; doi:10.1002/jcsm.12307), 2018-07-05
Supplement: JCSM-9-673-s001.pdf [file JCSM-9-673-s001.pdf]

**Supplemental Table 1. Tukey's Method For Post-Hoc Analysis**

| <b>Variable</b>             | <b>Phenotype</b>        | <b>Phenotype</b>              | <b>P value</b>   |
|-----------------------------|-------------------------|-------------------------------|------------------|
| Initial BMI                 | No Wasting              | Fat-Only Wasting              | 0.755            |
|                             |                         | Muscle and Fat Wasting        | 0.441            |
|                             | Fat-Only Wasting        | Muscle and Fat Wasting        | 0.951            |
| <b>BMI Change</b>           | <b>No Wasting</b>       | <b>Fat-Only Wasting</b>       | <b>0.008</b>     |
|                             |                         | <b>Muscle and Fat Wasting</b> | <b>0.011</b>     |
|                             | Fat-Only Wasting        | Muscle and Fat Wasting        | 0.635            |
| <b>BMI Percent Change</b>   | <b>No Wasting</b>       | <b>Fat-Only Wasting</b>       | <b>0.003</b>     |
|                             |                         | <b>Muscle and Fat Wasting</b> | <b>&lt;0.001</b> |
|                             | Fat-Only Wasting        | Muscle and Fat Wasting        | 0.996            |
| Initial SKMI                | No Wasting              | Fat-Only Wasting              | 0.659            |
|                             |                         | Muscle and Fat Wasting        | 0.311            |
|                             | <b>Fat-Only Wasting</b> | <b>Muscle and Fat Wasting</b> | <b>0.042</b>     |
| <b>SMI Kg Change</b>        | <b>No Wasting</b>       | Fat-Only Wasting              | 0.238            |
|                             |                         | <b>Muscle and Fat Wasting</b> | <b>&lt;0.001</b> |
|                             | <b>Fat-Only Wasting</b> | <b>Muscle and Fat Wasting</b> | <b>&lt;0.001</b> |
| <b>SKMI Percent Change</b>  | <b>No Wasting</b>       | Fat-Only Wasting              | 0.102            |
|                             |                         | <b>Muscle and Fat Wasting</b> | <b>&lt;0.001</b> |
|                             | <b>Fat-Only Wasting</b> | <b>Muscle and Fat Wasting</b> | <b>&lt;0.001</b> |
| Initial IMATI               | No Wasting              | Fat-Only Wasting              | 0.946            |
|                             |                         | Muscle and Fat Wasting        | 0.839            |
|                             | Fat-Only Wasting        | Muscle and Fat Wasting        | 0.987            |
| <b>IMAT Kg Change</b>       | <b>No Wasting</b>       | <b>Fat-Only Wasting</b>       | <b>0.010</b>     |
|                             |                         | <b>Muscle and Fat Wasting</b> | <b>0.007</b>     |
|                             | Fat-Only Wasting        | Muscle and Fat Wasting        | 0.78             |
| <b>IMATI Percent Change</b> | <b>No Wasting</b>       | <b>Fat-Only Wasting</b>       | <b>0.043</b>     |
|                             |                         | <b>Muscle and Fat Wasting</b> | <b>0.039</b>     |
|                             | Fat-Only Wasting        | Muscle and Fat Wasting        | 0.810            |
| Initial VATI                | No Wasting              | Fat-Only Wasting              | 0.547            |
|                             |                         | Muscle and Fat Wasting        | 0.874            |
|                             | Fat-Only Wasting        | Muscle and Fat Wasting        | 0.191            |
| <b>VAT Kg Change</b>        | <b>No Wasting</b>       | <b>Fat-Only Wasting</b>       | <b>0.043</b>     |
|                             |                         | <b>Muscle and Fat Wasting</b> | <b>&lt;0.001</b> |
|                             | Fat-Only Wasting        | Muscle and Fat Wasting        | 0.547            |
| <b>VATI Percent Change</b>  | <b>No Wasting</b>       | <b>Fat-Only Wasting</b>       | <b>&lt;0.001</b> |
|                             |                         | <b>Muscle and Fat Wasting</b> | <b>&lt;0.001</b> |
|                             | Fat-Only Wasting        | Muscle and Fat Wasting        | 0.984            |
| Initial SCATI               | No Wasting              | Fat-Only Wasting              | 0.974            |
|                             |                         | Muscle and Fat Wasting        | 0.256            |
|                             | Fat-Only Wasting        | Muscle and Fat Wasting        | 0.356            |
| <b>SCAT Kg Change</b>       | <b>No Wasting</b>       | Fat-Only Wasting              | 0.094            |
|                             |                         | <b>Muscle and Fat Wasting</b> | <b>&lt;0.001</b> |
|                             | Fat-Only Wasting        | Muscle and Fat Wasting        | 0.176            |
| <b>SCATI Percent Change</b> | <b>No Wasting</b>       | <b>Fat-Only Wasting</b>       | <b>&lt;0.001</b> |

|                              |                         |                               |                  |
|------------------------------|-------------------------|-------------------------------|------------------|
|                              |                         | <b>Muscle and Fat Wasting</b> | <b>&lt;0.001</b> |
|                              | Fat-Only Wasting        | Muscle and Fat Wasting        | 0.728            |
| Initial TAI                  | No Wasting              | Fat-Only Wasting              | 0.722            |
|                              |                         | Muscle and Fat Wasting        | 0.380            |
|                              | Fat-Only Wasting        | Muscle and Fat Wasting        | 0.075            |
| <b>TA Kg Change</b>          | <b>No Wasting</b>       | <b>Fat-Only Wasting</b>       | <b>0.013</b>     |
|                              |                         | <b>Muscle and Fat Wasting</b> | <b>&lt;0.001</b> |
|                              | Fat-Only Wasting        | Muscle and Fat Wasting        | 0.177            |
| <b>TAI Percent Change</b>    | <b>No Wasting</b>       | <b>Fat-Only Wasting</b>       | <b>&lt;0.001</b> |
|                              |                         | <b>Muscle and Fat Wasting</b> | <b>&lt;0.001</b> |
|                              | Fat-Only Wasting        | Muscle and Fat Wasting        | 0.932            |
| <b>Initial SKM HU</b>        | No Wasting              | Fat-Only Wasting              | 0.357            |
|                              |                         | Muscle and Fat Wasting        | 0.654            |
|                              | <b>Fat-Only Wasting</b> | <b>Muscle and Fat Wasting</b> | <b>0.037</b>     |
| <b>SKM HU Change</b>         | <b>No Wasting</b>       | <b>Fat-Only Wasting</b>       | <b>0.003</b>     |
|                              |                         | Muscle and Fat Wasting        | 0.795            |
|                              | <b>Fat-Only Wasting</b> | <b>Muscle and Fat Wasting</b> | <b>&lt;0.001</b> |
| <b>SKM HU Percent Change</b> | <b>No Wasting</b>       | <b>Fat-Only Wasting</b>       | <b>0.001</b>     |
|                              |                         | Muscle and Fat Wasting        | 0.972            |
|                              | <b>Fat-Only Wasting</b> | <b>Muscle and Fat Wasting</b> | <b>&lt;0.001</b> |
